# Supplementary material
Source: PubMed Central journal article supplement (PMC3497834)
Supplement: 1208603109_Appendix.pdf [file 1208603109_Appendix.pdf]

Independent Evaluation of Conflicting Microspherule Results from Different Investigations of the Younger Dryas Impact Hypothesis

SUPPORTING INFORMATION.

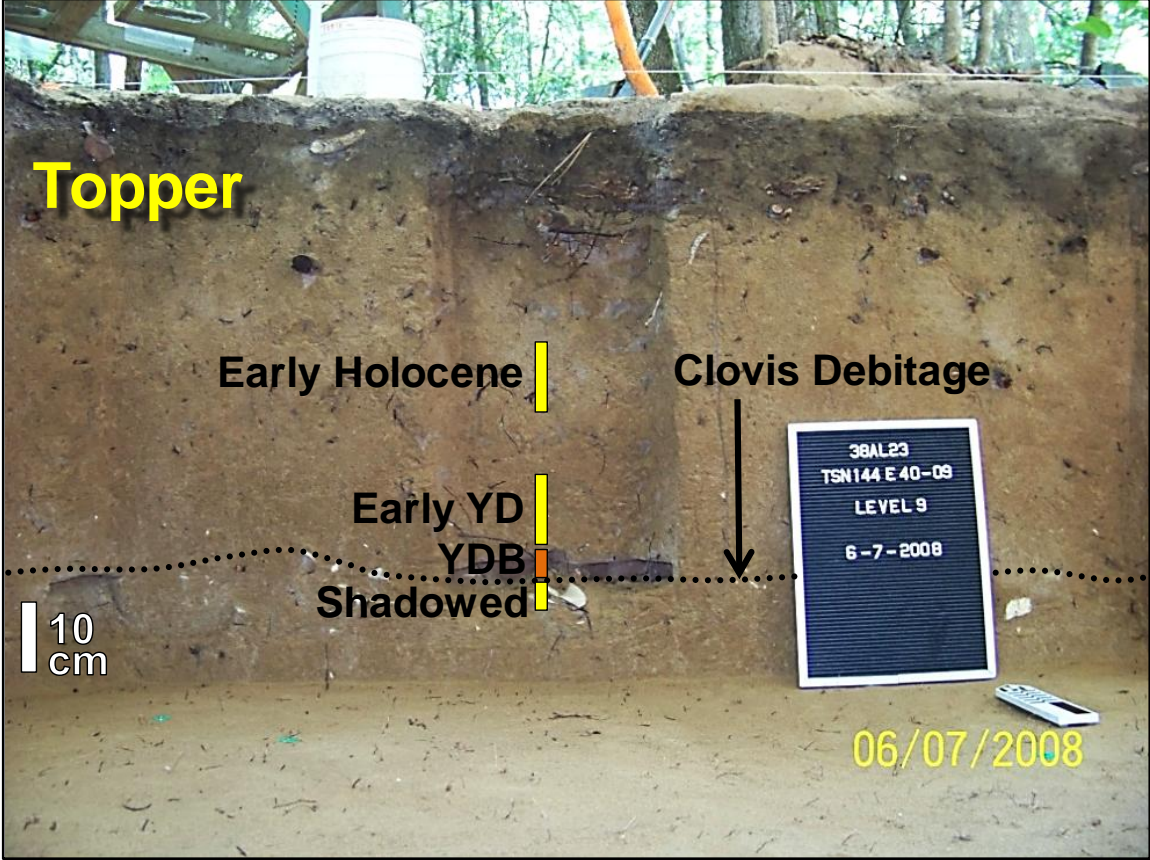

SI Fig. 1. Topper sampling site showing YDB layer as dotted black line, atop Clovis debitage. YDB sample location at orange bar; other samples at yellow bars.

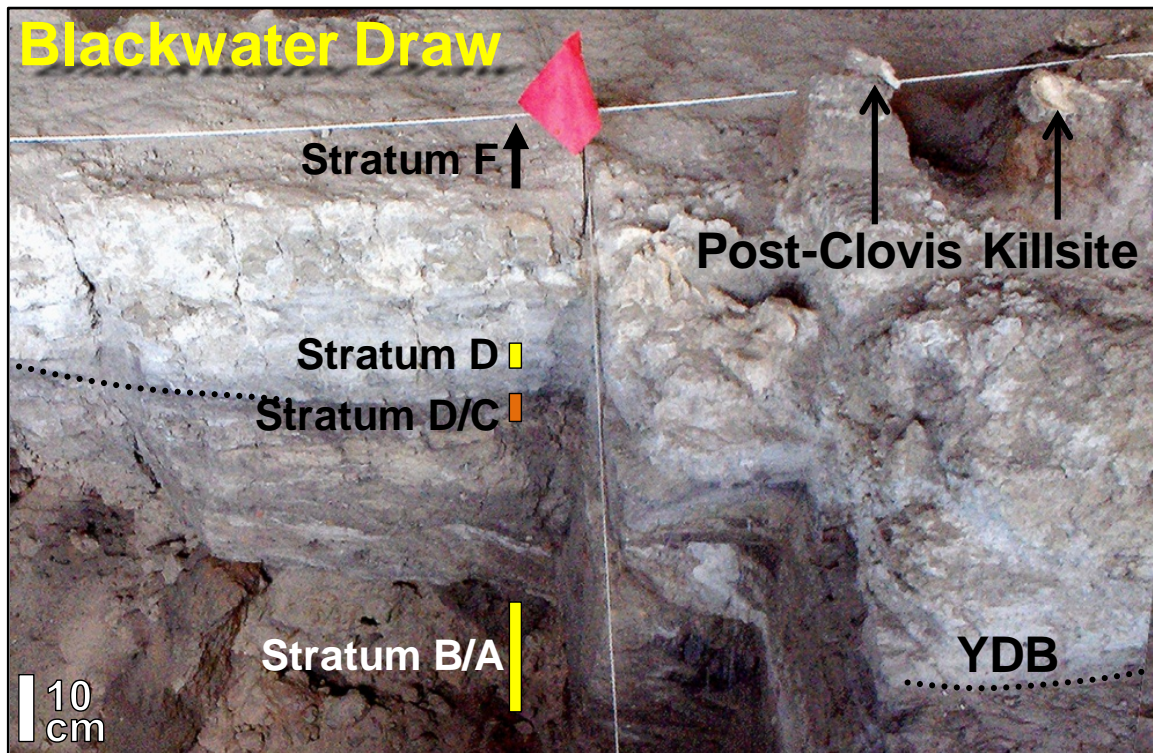

**SI Fig. 2.** BWD sampling site showing YDB layer as dotted line. YDB sample location at orange bar; other samples at yellow bars. Stratum F has been excavated and is not visible in this photo. Black arrows point to bones from a post-Clovis bison kill dating to many hundreds of years after 12,900 years ago. There are no artifacts known in the intervening strata.

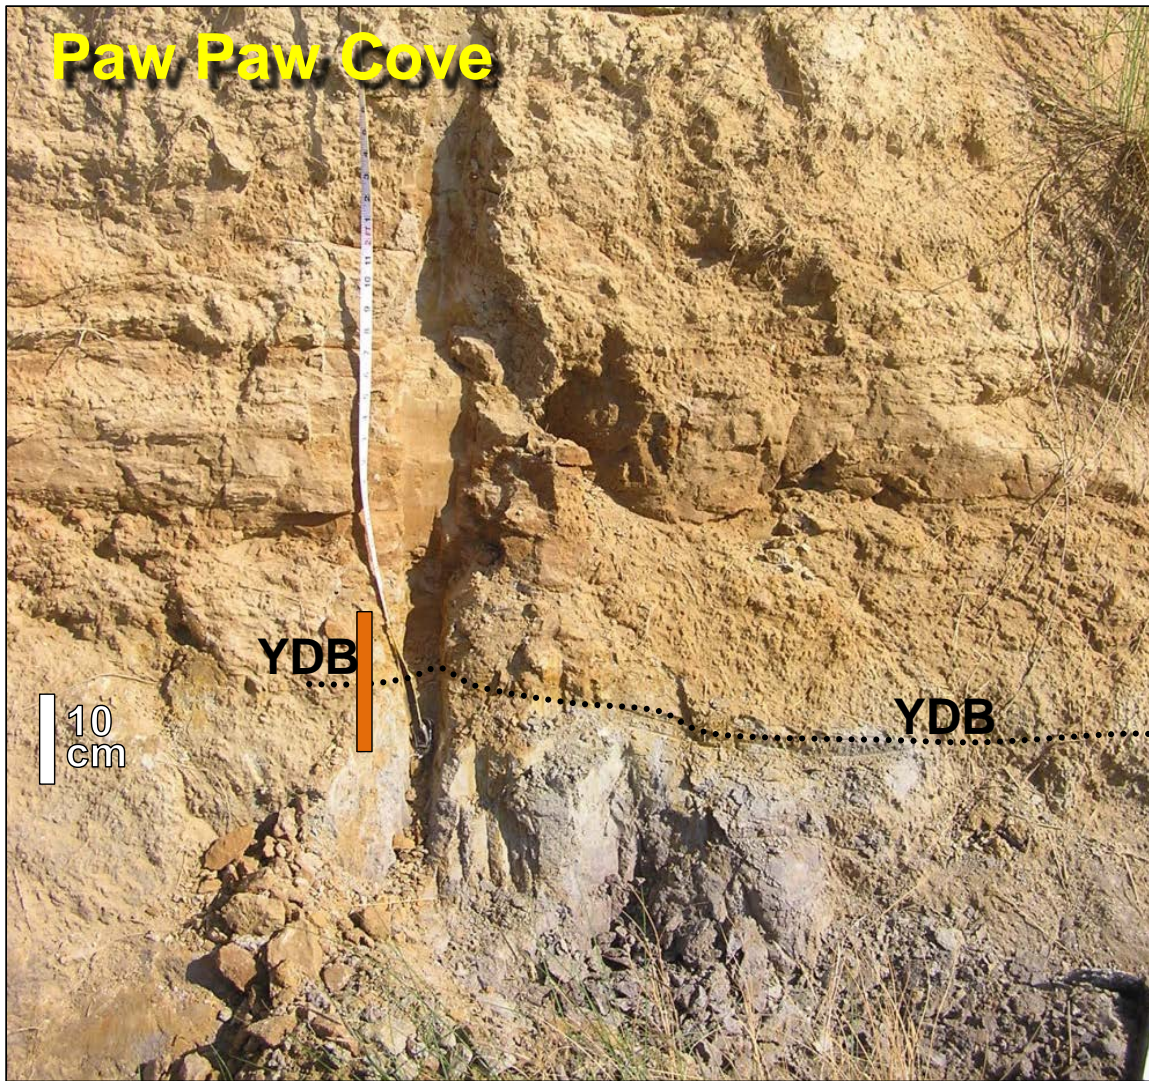

**SI Fig. 3.** PPC sampling site showing YDB layer as dotted line. YDB sample location at orange bar.

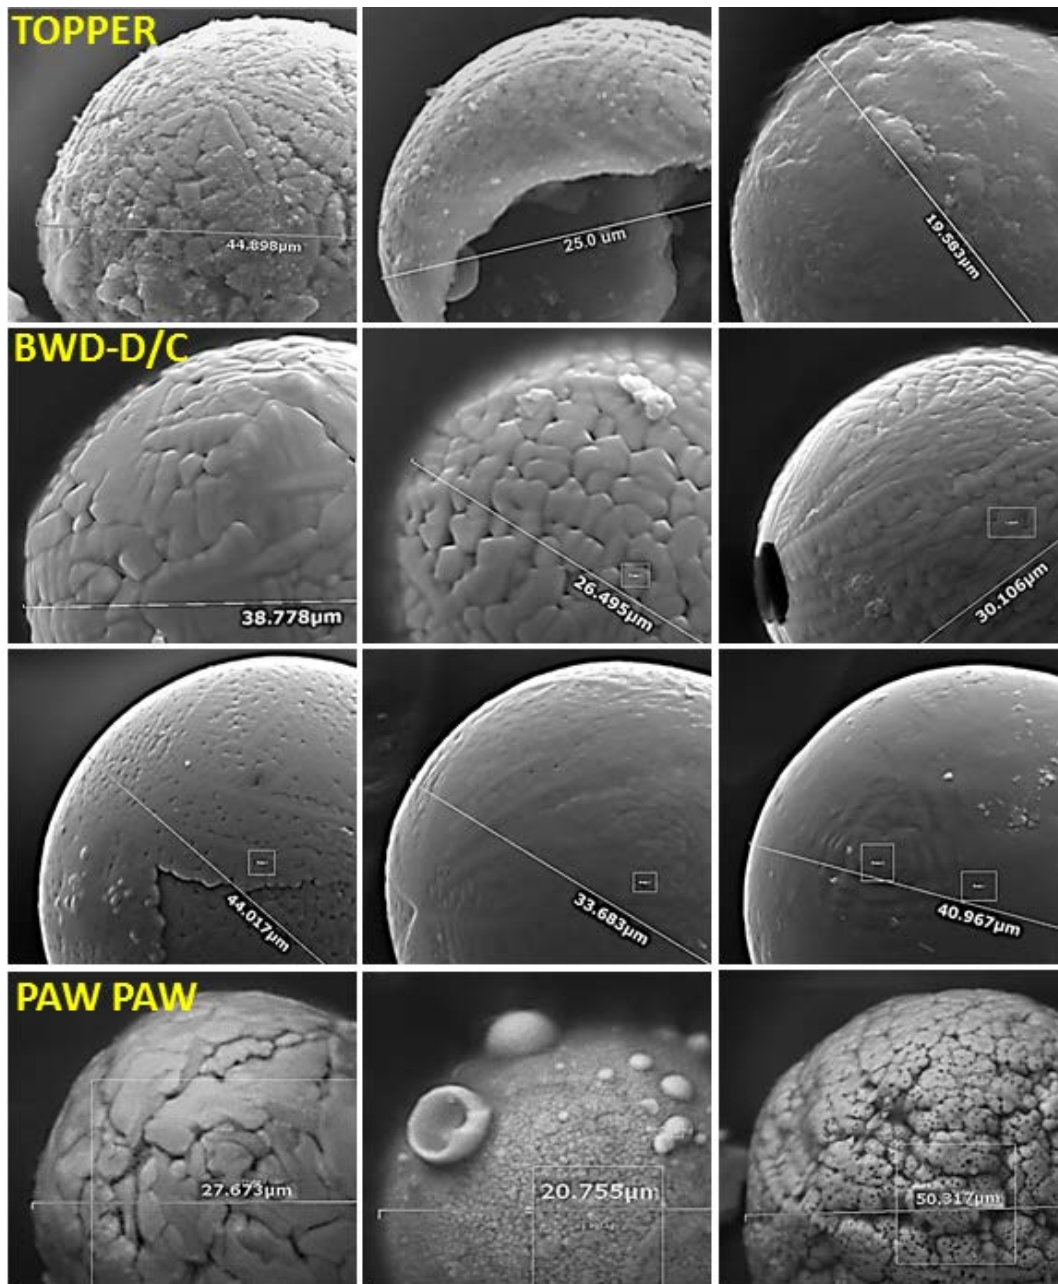

**SI Fig. 4.** YDB spherules displaying some of the wide range of surface microstructures indicative of melting and rapid quenching. Top three are from above the debitage layer at Topper. Middle six are from Blackwater Draw (BWD) in the D/C layer. Bottom three are from Paw Paw Cove (PPC).

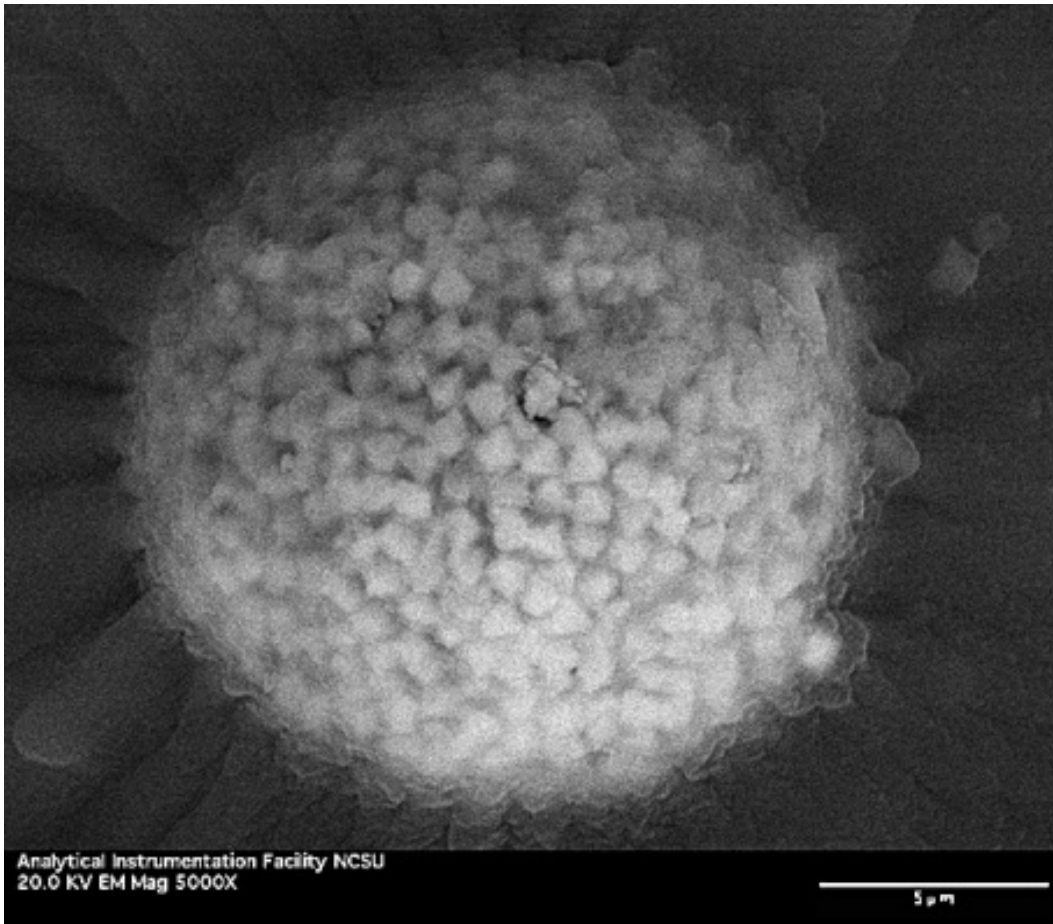

**SI Fig. 5.** SEM Micrograph showing a Topper 17-µm-diameter framboidal spherule. At these three sites, framboids are morphologically different but chemically indistinguishable from the apparently melted microspherules described in the foregoing. On the other hand, Israde et al. (2012) reported that sulfur-rich framboids from Lake Cuitzeo, Mexico are chemically different from the ones we observed.

**SI Table 1.** Oxide percentages of microspherules analyzed from Topper, SC.

|    | Layer and spherule #       | Microns   | FeO          | Al <sub>2</sub> O <sub>3</sub> | MgO         | CaO         | SiO <sub>2</sub> | K <sub>2</sub> O | Na <sub>2</sub> O | TiO <sub>2</sub> | P <sub>2</sub> O <sub>5</sub> | MnO         | Cr <sub>2</sub> O <sub>3</sub> | NiO         | SO <sub>3</sub> |
|----|----------------------------|-----------|--------------|--------------------------------|-------------|-------------|------------------|------------------|-------------------|------------------|-------------------------------|-------------|--------------------------------|-------------|-----------------|
| 1  | TU2-YDB-Sph-1-110505       | 33        | 8.66         | 24.64                          | 0.02        | 0.45        | 63.78            | 1.64             | 0.01              | 0.74             | 0.00                          | 0.01        | 0.00                           | 0.03        | 0.01            |
| 2  | TU2-YDB-Sph-2-110505-28mic | 28        | 66.53        | 14.87                          | 0.07        | 0.53        | 11.58            | 1.74             | 0.41              | 0.64             | 3.06                          | 0.22        | 0.00                           | 0.00        | 0.35            |
| 3  | TU2-YDB-Sph-3-100514       | 17        | 88.64        | 6.15                           | 0.00        | 0.63        | 4.58             | 0.00             | 0.00              | 0.00             | 0.00                          | 0.00        | 0.00                           | 0.00        | 0.00            |
| 4  | TU2-YDB-Sph-4-110505       | 26        | 96.31        | 1.86                           | 0.00        | 0.38        | 0.45             | 0.00             | 0.00              | 0.68             | 0.00                          | 0.00        | 0.18                           | 0.00        | 0.14            |
| 5  | TU2-YDB-Sph-5-110505       | 45        | 75.34        | 12.39                          | 0.81        | 0.15        | 9.99             | 0.01             | 0.33              | 0.92             | 0.00                          | 0.02        | 0.01                           | 0.03        | 0.00            |
| 6  | TU2-YDB-Sph-6-110505       | 25        | 91.78        | 3.60                           | 0.47        | 0.25        | 2.96             | 0.20             | 0.65              | 0.01             | 0.00                          | 0.00        | 0.01                           | 0.00        | 0.07            |
| 7  | TU2-YDB-Sph-8-110506       | 20        | 96.86        | 1.51                           | 0.00        | 0.39        | 0.47             | 0.00             | 0.00              | 0.22             | 0.02                          | 0.00        | 0.42                           | 0.00        | 0.11            |
| 8  | TU2-YDB-Sph-9-110506       | 30        | 54.25        | 16.60                          | 0.22        | 0.58        | 27.29            | 0.50             | 0.31              | 0.23             | 0.00                          | 0.00        | 0.02                           | 0.00        | 0.00            |
| 9  | TU2-YDB-Sph-17-110314      | 23        | 49.00        | 4.53                           | 4.98        | 0.07        | 3.48             | 0.13             | 1.52              | 34.98            | 0.98                          | 0.33        | 0.01                           | 0.00        | 0.00            |
| 10 | TU2-YD-Sph-1-110314        | 26        | 37.38        | 6.63                           | 1.55        | 0.07        | 3.30             | 0.00             | 0.86              | 47.02            | 0.62                          | 2.55        | 0.01                           | 0.00        | 0.00            |
| 11 | TU2-YD-Sph-2-110314        | 48        | 4.70         | 39.09                          | 0.57        | 0.08        | 54.56            | 0.25             | 0.44              | 0.01             | 0.28                          | 0.00        | 0.01                           | 0.01        | 0.00            |
|    | <b>AVERAGES (25):</b>      | <b>29</b> | <b>60.86</b> | <b>11.99</b>                   | <b>0.79</b> | <b>0.33</b> | <b>16.59</b>     | <b>0.41</b>      | <b>0.41</b>       | <b>7.77</b>      | <b>0.45</b>                   | <b>0.28</b> | <b>0.06</b>                    | <b>0.01</b> | <b>0.06</b>     |

**SI Table 2.** Oxide percentages of microspherules analyzed from Blackwater Draw, NM.

|    | Layer and spherule #             | Mic.      | FeO          | Al <sub>2</sub> O <sub>3</sub> | MgO         | CaO         | SiO <sub>2</sub> | K <sub>2</sub> O | Na <sub>2</sub> O | TiO <sub>2</sub> | P <sub>2</sub> O <sub>5</sub> | MnO         | Cr <sub>2</sub> O <sub>3</sub> | NiO         | SO <sub>3</sub> |
|----|----------------------------------|-----------|--------------|--------------------------------|-------------|-------------|------------------|------------------|-------------------|------------------|-------------------------------|-------------|--------------------------------|-------------|-----------------|
| 1  | BWD-DC-Sph-1-100514-33mic        | 33        | 57.63        | 1.46                           | 0.18        | 1.90        | 6.32             | 1.81             | 8.92              | 0.95             | 0.11                          | 4.17        | 2.10                           | 2.32        | 12.13           |
| 2  | BWD-DC-Sph-1-100621-29mic        | 29        | 94.08        | 2.00                           | 0.63        | 0.20        | 1.72             | 0.00             | 0.86              | 0.08             | 0.27                          | 0.15        | 0.00                           | 0.01        | 0.00            |
| 3  | BWD-DC-Sph-2-100621-33mic        | 33        | 93.74        | 2.18                           | 0.88        | 0.21        | 1.77             | 0.01             | 0.93              | 0.05             | 0.00                          | 0.00        | 0.02                           | 0.00        | 0.21            |
| 4  | BWD-DC-Sph-3-100621-34mic        | 34        | 93.15        | 2.83                           | 0.96        | 0.07        | 1.56             | 0.10             | 1.22              | 0.00             | 0.00                          | 0.11        | 0.00                           | 0.00        | 0.00            |
| 5  | BWD-DC-Sph-4-100621-37mic        | 37        | 87.74        | 2.69                           | 1.22        | 0.13        | 4.52             | 0.00             | 1.03              | 0.02             | 0.10                          | 2.10        | 0.15                           | 0.04        | 0.26            |
| 6  | BWD-DC-Sph-1-110314-36mic        | 36        | 65.35        | 2.54                           | 2.13        | 2.32        | 25.67            | 0.05             | 1.09              | 0.07             | 0.17                          | 0.00        | 0.00                           | 0.00        | 0.60            |
| 7  | BWD-DC-Sph-2-110314-30mic        | 30        | 97.15        | 1.07                           | 0.00        | 0.25        | 1.00             | 0.00             | 0.00              | 0.01             | 0.34                          | 0.18        | 0.00                           | 0.00        | 0.00            |
| 8  | BWD-DC-Sph-3-110314-44mic        | 44        | 91.71        | 1.39                           | 1.02        | 0.27        | 2.81             | 0.02             | 0.56              | 0.00             | 0.41                          | 1.78        | 0.02                           | 0.01        | 0.00            |
| 9  | BWD-DC-Sph-4-110314-27mic        | 27        | 94.42        | 1.62                           | 0.99        | 0.28        | 1.51             | 0.10             | 0.65              | 0.00             | 0.21                          | 0.21        | 0.00                           | 0.01        | 0.00            |
| 10 | BWD-DC-Sph-5-110314-34mic        | 34        | 95.39        | 2.16                           | 0.50        | 0.21        | 0.84             | 0.00             | 0.32              | 0.01             | 0.17                          | 0.38        | 0.00                           | 0.02        | 0.00            |
| 11 | BWD-DC-Sph-6-110314-26mic        | 26        | 95.48        | 1.05                           | 0.45        | 0.37        | 1.18             | 0.00             | 0.47              | 0.22             | 0.31                          | 0.44        | 0.02                           | 0.01        | 0.00            |
| 12 | BWD-DC-Sph-7-110314-31mic        | 31        | 95.72        | 0.95                           | 0.87        | 0.24        | 1.17             | 0.02             | 0.54              | 0.11             | 0.36                          | 0.00        | 0.00                           | 0.02        | 0.00            |
| 13 | BWD-DC-Sph-8-110314-39mic        | 39        | 94.91        | 1.25                           | 0.90        | 0.19        | 1.54             | 0.00             | 0.52              | 0.00             | 0.26                          | 0.43        | 0.00                           | 0.00        | 0.00            |
| 14 | BWD-DC-Sph-8-110314-39mic        | 39        | 94.07        | 1.39                           | 1.04        | 0.20        | 1.98             | 0.00             | 0.77              | 0.00             | 0.21                          | 0.34        | 0.00                           | 0.00        | 0.00            |
| 15 | BWD-DC-Sph-9-110314-41mic        | 41        | 95.70        | 1.35                           | 0.81        | 0.28        | 1.03             | 0.01             | 0.51              | 0.02             | 0.25                          | 0.03        | 0.00                           | 0.01        | 0.00            |
| 16 | BWD-DC-Sph-9-110314-41mic spot   | 41        | 93.46        | 1.86                           | 1.20        | 0.17        | 1.82             | 0.05             | 1.00              | 0.02             | 0.34                          | 0.00        | 0.00                           | 0.08        | 0.00            |
| 17 | BWD-DC-Sph-10-110314-30mic       | 30        | 96.59        | 0.85                           | 0.44        | 0.27        | 1.22             | 0.06             | 0.27              | 0.01             | 0.08                          | 0.21        | 0.00                           | 0.00        | 0.00            |
| 18 | BWD-D-Sph-1-110314-32mic spot 1  | 32        | 94.85        | 1.93                           | 0.68        | 0.25        | 1.46             | 0.00             | 0.43              | 0.08             | 0.25                          | 0.06        | 0.01                           | 0.00        | 0.00            |
| 19 | BWD-D-Sph-1-110314-32mic-spot 2  | 32        | 89.79        | 2.83                           | 1.59        | 0.27        | 2.95             | 0.13             | 1.43              | 0.55             | 0.29                          | 0.07        | 0.00                           | 0.10        | 0.00            |
| 20 | BWD-D-Sph-2-110314-30mic spot 1  | 30        | 96.72        | 1.22                           | 0.03        | 0.29        | 1.09             | 0.06             | 0.00              | 0.09             | 0.00                          | 0.31        | 0.00                           | 0.00        | 0.19            |
| 21 | BWD-D-Sph-2-110314-30mic spot 2  | 30        | 96.37        | 1.17                           | 0.09        | 0.27        | 1.56             | 0.02             | 0.00              | 0.09             | 0.00                          | 0.28        | 0.00                           | 0.00        | 0.15            |
| 22 | BWD-D-Sph-3-110314-35mic spot 1  | 35        | 92.56        | 2.30                           | 1.00        | 0.33        | 1.61             | 0.10             | 0.68              | 0.01             | 0.43                          | 0.96        | 0.00                           | 0.02        | 0.00            |
| 23 | BWD-D-Sph-3-110314-35mic spot 2  | 35        | 93.29        | 2.00                           | 0.61        | 0.37        | 1.89             | 0.00             | 0.51              | 0.00             | 0.32                          | 0.99        | 0.00                           | 0.02        | 0.00            |
| 24 | BWD-D-Sph-4-110314-34mic         | 34        | 94.99        | 1.51                           | 0.87        | 0.28        | 1.24             | 0.13             | 0.64              | 0.01             | 0.07                          | 0.25        | 0.00                           | 0.01        | 0.00            |
| 25 | BWD-D-Sph-5-110314-39mic         | 39        | 93.17        | 2.01                           | 1.21        | 0.12        | 2.14             | 0.06             | 0.69              | 0.02             | 0.33                          | 0.25        | 0.00                           | 0.00        | 0.00            |
| 26 | BWD-D-Sph-6-110314-23mic         | 23        | 94.21        | 1.72                           | 0.94        | 0.23        | 1.58             | 0.00             | 0.87              | 0.00             | 0.31                          | 0.14        | 0.00                           | 0.00        | 0.00            |
| 27 | BWD-D-Sph-7-110314-29mic         | 29        | 95.12        | 1.63                           | 0.83        | 0.12        | 1.25             | 0.04             | 0.60              | 0.01             | 0.24                          | 0.16        | 0.00                           | 0.00        | 0.00            |
| 28 | BWD-D-Sph-8-110314-33mic spot 1  | 33        | 93.55        | 2.03                           | 1.22        | 0.31        | 1.48             | 0.00             | 0.98              | 0.00             | 0.20                          | 0.19        | 0.00                           | 0.04        | 0.00            |
| 29 | BWD-D-Sph-8-110314-33mic spot 2  | 33        | 93.51        | 1.81                           | 1.42        | 0.33        | 1.24             | 0.09             | 0.79              | 0.00             | 0.31                          | 0.50        | 0.00                           | 0.00        | 0.00            |
| 30 | BWD-D-Sph-9-110314-49mic spot 1  | 49        | 96.12        | 1.12                           | 0.47        | 0.14        | 1.29             | 0.08             | 0.28              | 0.03             | 0.24                          | 0.23        | 0.00                           | 0.00        | 0.00            |
| 31 | BWD-D-Sph-9-110314-49mic spot 2  | 49        | 96.83        | 0.75                           | 0.45        | 0.15        | 0.90             | 0.00             | 0.42              | 0.04             | 0.26                          | 0.20        | 0.00                           | 0.00        | 0.00            |
| 32 | BWD-D-Sph-10-110314-20mic        | 20        | 91.79        | 1.88                           | 1.10        | 0.55        | 3.08             | 0.00             | 0.91              | 0.00             | 0.62                          | 0.04        | 0.00                           | 0.03        | 0.00            |
| 33 | BWD-D-Sph-11-110314-35mic        | 35        | 96.63        | 1.18                           | 0.45        | 0.31        | 0.76             | 0.00             | 0.45              | 0.06             | 0.15                          | 0.01        | 0.00                           | 0.00        | 0.00            |
| 34 | BWD-D-Sph-12-110314-27mic        | 27        | 93.68        | 1.68                           | 0.90        | 0.27        | 1.01             | 0.07             | 0.77              | 0.00             | 0.36                          | 1.23        | 0.01                           | 0.02        | 0.00            |
| 35 | BWD-D-Sph-13-110314-28mic        | 28        | 96.76        | 1.51                           | 0.17        | 0.09        | 0.68             | 0.00             | 0.28              | 0.01             | 0.18                          | 0.27        | 0.02                           | 0.00        | 0.03            |
| 36 | BWD-D-Sph-14-110314-29mic        | 29        | 93.54        | 1.85                           | 1.08        | 0.33        | 1.77             | 0.09             | 0.82              | 0.01             | 0.24                          | 0.27        | 0.00                           | 0.00        | 0.00            |
| 37 | BWD-D-Sph-15-110314-34mic spot 1 | 34        | 37.12        | 2.42                           | 1.59        | 0.13        | 3.33             | 0.03             | 1.02              | 53.89            | 0.20                          | 0.26        | 0.01                           | 0.00        | 0.00            |
| 38 | BWD-D-Sph-15-110314-34mic spot 2 | 34        | 36.49        | 1.10                           | 0.27        | 0.25        | 2.29             | 0.03             | 0.43              | 57.70            | 0.26                          | 0.58        | 0.00                           | 0.00        | 0.60            |
| 39 | BWD-D-Sph-15-110314-34mic spot 3 | 34        | 25.47        | 5.16                           | 2.58        | 0.53        | 14.06            | 0.37             | 0.82              | 50.79            | 0.00                          | 0.05        | 0.01                           | 0.00        | 0.16            |
| 40 | BWD-D-Sph-16-110314-31mic        | 31        | 96.60        | 0.79                           | 0.21        | 0.16        | 1.12             | 0.00             | 0.30              | 0.01             | 0.47                          | 0.23        | 0.01                           | 0.00        | 0.10            |
| 41 | BWD-D-Sph-17-110314-23mic        | 23        | 91.71        | 1.39                           | 1.02        | 0.27        | 2.81             | 0.02             | 0.56              | 0.00             | 0.41                          | 1.78        | 0.02                           | 0.01        | 0.00            |
| 42 | BWD-D-Sph-18-110314-41mic spot 1 | 41        | 59.86        | 2.19                           | 2.69        | 0.14        | 1.68             | 0.03             | 0.02              | 32.65            | 0.33                          | 0.12        | 0.00                           | 0.00        | 0.29            |
| 43 | BWD-D-Sph-18-110314-41mic spot 2 | 41        | 55.29        | 3.41                           | 4.68        | 0.38        | 2.99             | 0.00             | 0.78              | 31.95            | 0.37                          | 0.07        | 0.03                           | 0.02        | 0.03            |
| 44 | BWD-D-Sph-18-110314-41mic spot 3 | 41        | 48.19        | 4.41                           | 6.77        | 0.17        | 4.35             | 0.00             | 1.17              | 34.52            | 0.34                          | 0.02        | 0.01                           | 0.05        | 0.00            |
| 45 | BWD-D-Sph-19-110314-25mic        | 25        | 96.51        | 0.90                           | 0.12        | 0.12        | 1.43             | 0.01             | 0.34              | 0.44             | 0.13                          | 0.00        | 0.00                           | 0.00        | 0.00            |
| 46 | BWD-D-Sph-20-110314-48mic        | 48        | 96.29        | 0.83                           | 0.91        | 0.09        | 0.90             | 0.03             | 0.51              | 0.04             | 0.27                          | 0.13        | 0.00                           | 0.00        | 0.00            |
| 47 | BWD-D-Sph-21-110314-34mic spot 1 | 34        | 94.10        | 1.57                           | 0.44        | 0.27        | 1.79             | 0.11             | 0.68              | 0.01             | 0.41                          | 0.49        | 0.00                           | 0.00        | 0.13            |
| 48 | BWD-D-Sph-22-110314-37mic spot 1 | 37        | 98.63        | 0.22                           | 0.00        | 0.17        | 0.84             | 0.01             | 0.00              | 0.08             | 0.00                          | 0.05        | 0.00                           | 0.00        | 0.00            |
| 49 | BWD-D-Sph-22-110314-37mic spot 2 | 37        | 45.22        | 2.37                           | 6.30        | 0.01        | 4.27             | 0.02             | 1.33              | 39.41            | 0.00                          | 1.01        | 0.05                           | 0.01        | 0.00            |
| 50 | BWD-D-Sph-22-110314-37mic spot 3 | 37        | 41.88        | 6.80                           | 4.96        | 0.58        | 15.48            | 0.22             | 0.85              | 27.00            | 0.04                          | 1.95        | 0.03                           | 0.00        | 0.21            |
| 51 | BWD-D-Sph-22-110314-37mic spot 4 | 37        | 73.37        | 3.09                           | 3.43        | 0.04        | 5.28             | 0.01             | 1.42              | 12.26            | 0.37                          | 0.59        | 0.00                           | 0.00        | 0.14            |
| 52 | BWD-D-Sph-23-110314-25mic        | 25        | 95.95        | 0.69                           | 0.53        | 0.20        | 1.73             | 0.06             | 0.33              | 0.03             | 0.10                          | 0.31        | 0.00                           | 0.03        | 0.04            |
|    | <b>AVERAGES (52):</b>            | <b>34</b> | <b>85.05</b> | <b>1.89</b>                    | <b>1.27</b> | <b>0.31</b> | <b>2.90</b>      | <b>0.08</b>      | <b>0.80</b>       | <b>6.60</b>      | <b>0.23</b>                   | <b>0.47</b> | <b>0.05</b>                    | <b>0.06</b> | <b>0.29</b>     |

**SI Table 3.** Oxide percentages of microspherules analyzed from Paw Paw Cove, MD. Note REEs for one spherule.

| Layer and spherule #               | Mic.      | FeO          | Al <sub>2</sub> O <sub>3</sub> | MgO         | CaO         | SiO <sub>2</sub> | K <sub>2</sub> O | Na <sub>2</sub> O | TiO <sub>2</sub> | P <sub>2</sub> O <sub>5</sub> | MnO         | Cr <sub>2</sub> O <sub>3</sub> | NiO         | SO <sub>3</sub> | La <sub>2</sub> O <sub>3</sub> | CeO <sub>2</sub> | Pr <sub>6</sub> O <sub>11</sub> | Nd <sub>2</sub> O <sub>3</sub> |
|------------------------------------|-----------|--------------|--------------------------------|-------------|-------------|------------------|------------------|-------------------|------------------|-------------------------------|-------------|--------------------------------|-------------|-----------------|--------------------------------|------------------|---------------------------------|--------------------------------|
| 1 PPC-YDB-Sph-1-100707-17mic       | 17        | 42.4         | 2.89                           | 1.25        | 0.43        | 1.87             | 0.2              | 2.67              | 45.9             | 0.97                          | 0.96        | 0.00                           | 0           | 0.5             | 0.00                           | 0.00             | 0.00                            | 0.00                           |
| 2 PPC-YDB-Sph-2-100707-21mic       | 21        | 48.24        | 4.79                           | 6.11        | 0.12        | 2.66             | 0.03             | 4.90              | 0.03             | 0.00                          | 0.84        | 0.12                           | 0.01        | 0.21            | 10.10                          | 21.83            | 0.00                            | 0.00                           |
| 3 PPC-YDB-Sph-2-100707-21mic Rim   | 21        | 24.00        | 7.37                           | 2.40        | 0.72        | 4.85             | 0.13             | 1.18              | 1.07             | 0.06                          | 0.38        | 0.00                           | 0.00        | 2.17            | 22.17                          | 27.56            | 3.72                            | 2.21                           |
| 4 PPC-YDB-Sph-2-100707 21mic Bulge | 21        | 47.23        | 5.07                           | 5.05        | 0.26        | 3.68             | 0.04             | 5.94              | 0.39             | 0.04                          | 0.00        | 0.00                           | 0.03        | 0.86            | 9.59                           | 21.81            | 0.00                            | 0.00                           |
| 5 PPC-YDB-Sph-3-100707 36mic       | 36        | 22.89        | 6.82                           | 0.73        | 0.25        | 2.55             | 0.05             | 0.64              | 52.23            | 0.28                          | 13.20       | 0.01                           | 0.00        | 0.35            | 0.00                           | 0.00             | 0.00                            | 0.00                           |
| 6 PPC-YDB-Sph-4-100707 50mic       | 50        | 41.00        | 6.83                           | 0.67        | 0.12        | 2.59             | 0.05             | 0.61              | 47.5             | 0.12                          | 0.01        | 0.01                           | 0.00        | 0.45            | 0.00                           | 0.00             | 0.00                            | 0.00                           |
| 7 PPC-YDB-Sph-5-100707 28mic       | 28        | 39.22        | 3.64                           | 0.00        | 0.35        | 2.14             | 0.22             | 0.00              | 50.85            | 0.67                          | 2.91        | 0.00                           | 0.00        | 0.00            | 0.00                           | 0.00             | 0.00                            | 0.00                           |
| 8 PPC-YDB-Subround-100707-27mic    | 27        | 51.10        | 3.42                           | 1.80        | 0.27        | 2.77             | 0.08             | 0.29              | 39.71            | 0.02                          | 0.29        | 0.05                           | 0.05        | 0.15            | 0.00                           | 0.00             | 0.00                            | 0.00                           |
| <b>AVERAGES (8):</b>               | <b>27</b> | <b>39.51</b> | <b>5.10</b>                    | <b>2.25</b> | <b>0.32</b> | <b>2.89</b>      | <b>0.10</b>      | <b>2.03</b>       | <b>29.72</b>     | <b>0.27</b>                   | <b>2.32</b> | <b>0.02</b>                    | <b>0.01</b> | <b>0.58</b>     | <b>5.23</b>                    | <b>8.90</b>      | <b>0.47</b>                     | <b>0.28</b>                    |

**SI Table 4.** Table below provides a summary comparison of each group's application of the Firestone et al. protocol.

| Protocol Measure                          | Firestone et al. (2007)<br>+ 08/07/2007 Protocol         | Surovell et al. (2009)                                         | LeCompte et al. (2010)                                            |
|-------------------------------------------|----------------------------------------------------------|----------------------------------------------------------------|-------------------------------------------------------------------|
| NdFeB Magnet Strength                     | N-42                                                     | N-42                                                           | N-52 <sup>*</sup>                                                 |
| Sediment Sample Amount                    | 0.5 - 1.0 kg                                             | 0.2 to 0.5 kg                                                  | 0.2 - 0.3 kg                                                      |
| Magnet's Plastic bag thickness            | 4 mil                                                    | 4 mil                                                          | 2-3 mil                                                           |
| Magnetic Grain Extraction Cycles          | 5 - 10 immersions                                        | Up to 30 @ 1-minute immersions                                 | 20 @ 45-second immersions                                         |
| Magnetic Grain Rinse Cycles <sup>**</sup> | As needed                                                | Series of baths as needed                                      | 10 @ 45-second immersions with 20-µm paper filtration             |
| Microscope Magnification (power x)        | 100-150x/150x                                            | 100x/100x <sup>***</sup>                                       | 130x/180x <sup>****</sup>                                         |
| Sieve for Size-Sorting                    | Recommended <150 µm                                      | 1 mm                                                           | 250 & 53 µm                                                       |
| Magnetic Grain -- total aliquot size      | 100 - 200 mg, up to total magnetic fraction              | 10-40 mg                                                       | 20-40 mg of the <53-µm magnetic fraction                          |
| Spherule Visual Characteristics           | Unfaceted; usually spherical; usually reflective surface | Unfaceted; perfectly spherical; only highly reflective surface | Unfaceted; nearly all spherical; mostly highly reflective surface |

\* N-42 exerts about 75% the magnetic force of N-52

\*\* Protocol did not provide explicit instructions regarding a rinse cycle

\*\*\* 300x using electronic pixel zoom (pixel density increase)

\*\*\*\* Scanning at >130x was necessary to detect spherules <15-20 µm diameter

**SI Table 5.** Topper quarry. Shows number and type of artifacts found during and after Clovis times (data from Anderson et al., 2011).

|                      | Site#  | St. | Clovis          | Post Clovis              | Type of Site                 |
|----------------------|--------|-----|-----------------|--------------------------|------------------------------|
| Topper Clovis Quarry | 38AI23 | SC  | 4 Clovis points | 1 Instrument-assist. pt. | Quarry, Workshop, Habitation |
|                      |        |     | 170 Preforms    |                          |                              |
|                      |        |     | 257 Blades      |                          |                              |
|                      |        |     | 22 Blade Cores  |                          |                              |
